# Supplementary material for: Whole genome sequencing identifies a novel ALMS1 gene mutation in two Chinese siblings with Alström syndrome
Source: BMC Med Genet. 2017 Jul 19;18:75. doi: 10.1186/s12881-017-0418-3 (PMC5518093; doi:10.1186/s12881-017-0418-3)
Supplement: Supplementary file 1 — Summary of the results of the WGS statistics in the family. (PDF 12 kb) [file 12881_2017_418_MOESM1_ESM.pdf]

Additional file 1 Summary of WGS statistics result in the family

| WGS statistics                         | Proband       | Brother       | Mother        | Father        |
|----------------------------------------|---------------|---------------|---------------|---------------|
| Raw reads                              | 1,329,167,624 | 1,248,056,386 | 1,233,150,314 | 1,272,370,156 |
| Clean reads                            | 1,281,801,928 | 1,206,649,174 | 1,191,089,244 | 1,222,016,642 |
| Clean data(G)                          | 115.36        | 108.6         | 107.2         | 109.98        |
| Sequencing depth                       | 38.45         | 36.2          | 35.73         | 36.66         |
| Reads mapped to genome                 | 1,246,044,401 | 1,173,677,874 | 1,160,303,655 | 1,187,869,090 |
| Map rate(%)                            | 97.03         | 97.14         | 97.27         | 97.07         |
| Duplication rate(%)                    | 6.25          | 4.66          | 5.4           | 4.84          |
| Mean depth of autosomes                | 36.72         | 35.28         | 33.91         | 35.52         |
| Coverage of genome(%)                  | 99.83         | 99.83         | 99.83         | 99.85         |
| Average read length(bp)                | 90            | 90            | 90            | 90            |
| Rate of nucleotide mismatch(           | 0.39          | 0.34          | 0.34          | 0.39          |
| Fraction of genomic covered<br>≥4X(%)  | 99.58         | 99.57         | 99.58         | 99.59         |
| Fraction of genomic covered<br>≥7X(%)  | 99.26         | 99.24         | 99.25         | 99.25         |
| Fraction of genomic covered<br>≥10X(%) | 98.78         | 98.69         | 98.71         | 98.69         |
| Fraction of genomic covered<br>≥20X(%) | 93.63         | 92.31         | 92.13         | 92.43         |
| Mean depth of chrX                     | 18.38         | 17.59         | 33.07         | 17.85         |
| Mean depth of chrY                     | 34.15         | 33.74         | 7.3           | 33.78         |
| Gender test result                     | M             | M             | F             | M             |
| GC content(%)                          | 41.31         | 41.46         | 41.21         | 41.34         |
